# Supplementary material
Source: MDPI journal article supplement (https://www.mdpi.com/2311-5637/9/6/555)
Supplement: s1 [file s1]

Supplementary Materials

# Optimization of Milbemycin Component Ratio by Coordinating Acyl-Coenzyme A Supply Pathways in *Streptomyces bingchenggensis*

Xue Yang <sup>1,†</sup>, Pinjiao Jin <sup>2,3,†</sup>, Zhuoxu Dong <sup>1,2</sup>, Yanyan Zhang <sup>1</sup>, Wensheng Xiang <sup>1,2,\*</sup> and Shanshan Li <sup>1,\*</sup>

<sup>1</sup> State Key Laboratory for Biology of Plant Diseases and Insect Pests, Institute of Plant Protection, Chinese Academy of Agricultural Sciences, No. 2 Yuanmingyuan West Road, Haidian District, Beijing 100193, China; 82101211024@caas.cn (X.Y.); d15945317995@163.com (Z.D.); yyzhang@ippcaas.cn (Y.Z.)

<sup>2</sup> School of Life Science, Northeast Agricultural University, No. 59 Mucai Street, Xiangfang District, Harbin 150030, China; jinpinjiao1992@163.com

<sup>3</sup> Heilongjiang Academy of Black Soil Conservation & Utilization, Postdoctoral Station of Heilongjiang Academy of Agricultural Sciences, No. 800, Innovation 3rd Road, Songbei District, Harbin 150086, China

\* Correspondence: xiangwensheng@neau.edu.cn (W.X.); ssli@ippcaas.cn (S.L.)

† These authors contributed equally to this work.

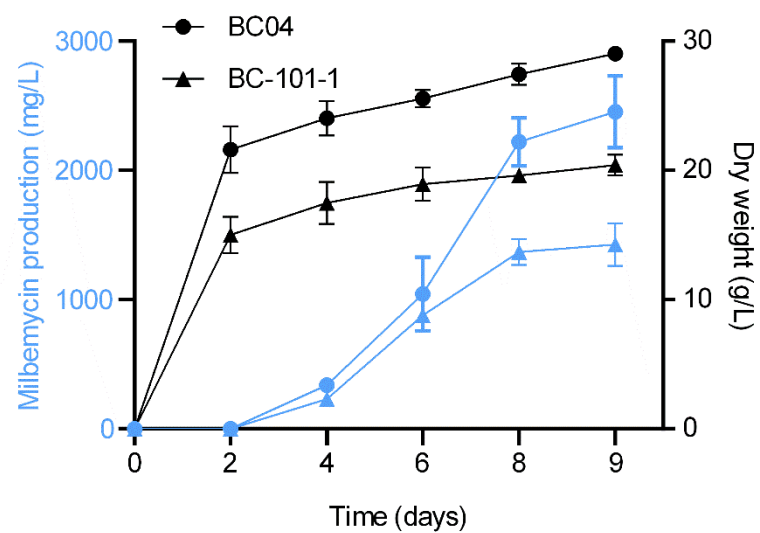

**Figure S1. Time-course curves of cell growth and milbemycin production.** Data shown are the average and s.d. of three independent experiments.

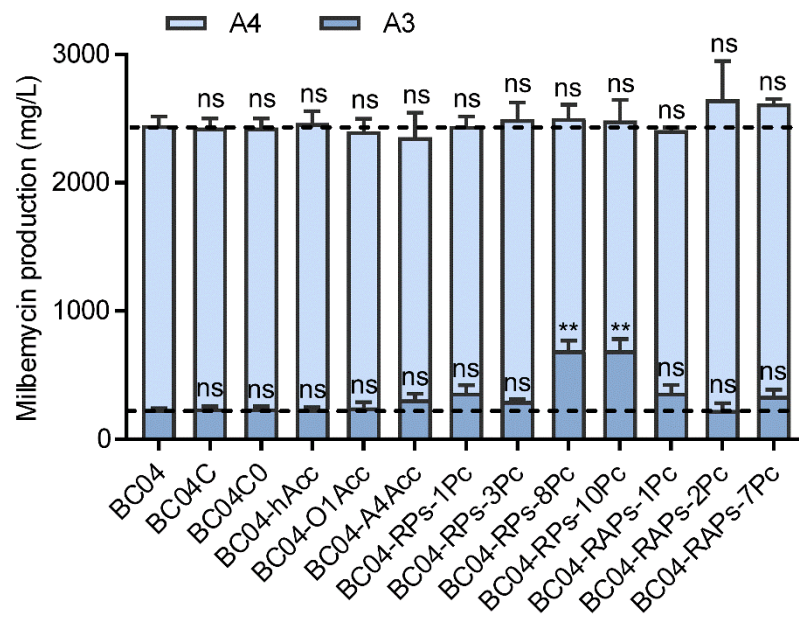

**Figure S2. Mutant strains without significant effects on milbemycin production in the precursor coordination strategy.** Data shown are the average and s.d. of three independent experiments. Differences are analyzed by Student's *t*-test,  $p < 0.05$  is considered statistically significant. Levels of significance are \*\*  $p < 0.01$ , "ns" means no significant difference.

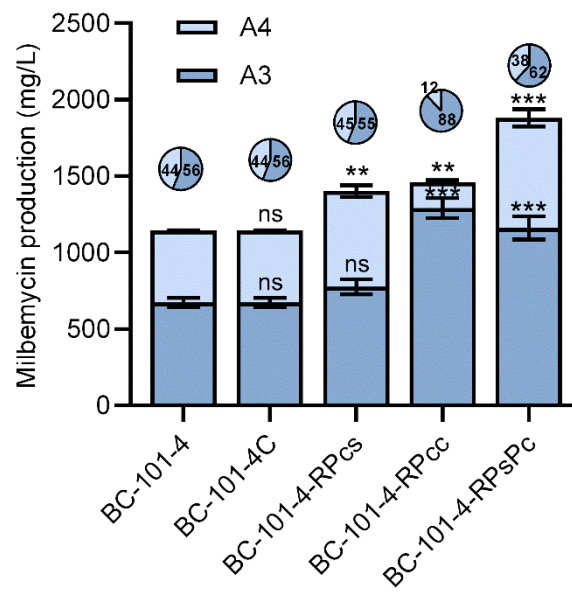

**Figure S3. The milbemycin production of PCS and PCC overexpression strains in BC-101-4.** Data shown are the average and s.d. of three independent experiments. Differences are analyzed by Student's *t*-test,  $p < 0.05$  is considered statistically significant. Levels of significance are \*\*\*  $p < 0.001$ , \*\*  $p < 0.01$ , “ns” means no significant difference.

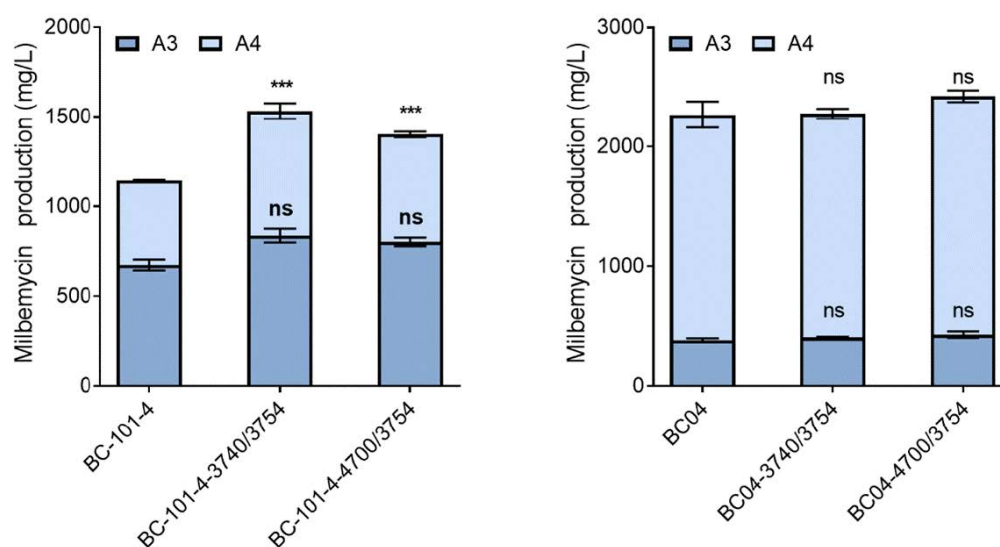

**Figure S4. The milbemycin production of MCM and MCE overexpression strains in BC-101-4 and BC04.** Data shown are the average and s.d. of three independent experiments. Differences are analyzed by Student's *t*-test,  $p < 0.05$  is considered statistically significant. Levels of significance are \*\*\*  $p < 0.001$ , "ns" means no significant difference.

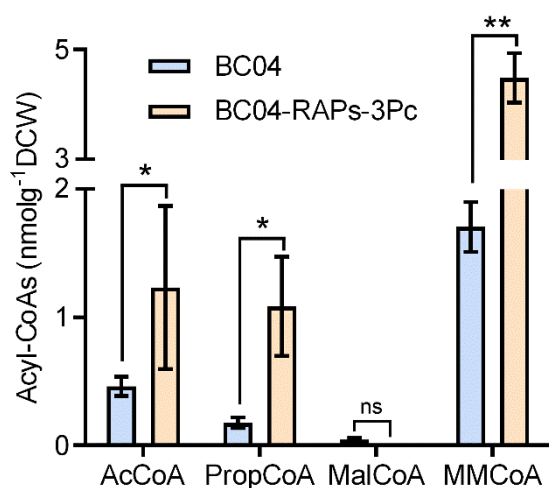

**Figure S5. The precursor concentration of strain BC04 and BC04-RAPs-3Pc.** Data shown are the average and s.d. of three independent experiments. Differences are analyzed by Student's *t*-test,  $p < 0.05$  is considered statistically significant. Levels of significance are \*\*  $p < 0.01$ , \*  $p < 0.05$ , "ns" means no significant difference.

**Table S1. Strains and Plasmids used in this work**

| Name                                | Description                                                                                                                                 | Source    |
|-------------------------------------|---------------------------------------------------------------------------------------------------------------------------------------------|-----------|
| <b>Strains</b>                      |                                                                                                                                             |           |
| <i>Escherichia coli</i>             |                                                                                                                                             |           |
| <i>E. coli</i> JM109                | General cloning host for plasmid manipulation                                                                                               | Novagen   |
| ET12567 (pUZ8002)                   | Donor strain for conjugation between <i>E. coli</i> and <i>Streptomyces</i>                                                                 | [1]       |
| <i>Streptomyces bingchenggensis</i> |                                                                                                                                             |           |
| BC-101-4                            | Low-yielding strain                                                                                                                         | [2]       |
| BC04                                | High-yielding strain of milbemycin A3/A4                                                                                                    | [3]       |
| BC-101-4C                           | BC-101-4 integrated with a copy of pSET152                                                                                                  | This work |
| BC04C0                              | BC04 integrated with a copy of pIJ10500                                                                                                     | This work |
| BC04C                               | BC04 integrated with a copy of pSET152                                                                                                      | This work |
| BC04-hAcc                           | BC04 integrated a copy of genes <i>sbi_06761</i> , <i>sbi_03526</i> and <i>sbi_03527</i> driven by the <i>hrdB</i> promoter                 | This work |
| BC04-O1Acc                          | BC04 integrated a copy of genes <i>sbi_06761</i> , <i>sbi_03526</i> and <i>sbi_03527</i> driven by the promoter region of gene <i>orf1</i>  | This work |
| BC04-A1Acc                          | BC04 integrated a copy of genes <i>sbi_06761</i> , <i>sbi_03526</i> and <i>sbi_03527</i> driven by the promoter region of gene <i>milA1</i> | This work |
| BC04-A2Acc                          | BC04 integrated a copy of genes <i>sbi_06761</i> , <i>sbi_03526</i> and <i>sbi_03527</i> driven by the promoter region of gene <i>milA2</i> | This work |
| BC04-A4Acc                          | BC04 integrated a copy of genes <i>sbi_06761</i> , <i>sbi_03526</i> and <i>sbi_03527</i> driven by the promoter region of gene <i>milA4</i> | This work |
| BC04-RAcc                           | BC04 integrated a copy of genes <i>sbi_06761</i> , <i>sbi_03526</i> and <i>sbi_03527</i> driven by the promoter region of gene <i>milR</i>  | This work |

|                    |                                                                                                                                            |           |
|--------------------|--------------------------------------------------------------------------------------------------------------------------------------------|-----------|
| BC04-FAcc          | BC04 integrated a copy of genes <i>sbi_06761</i> , <i>sbi_03526</i> and <i>sbi_03527</i> driven by the promoter region of gene <i>milF</i> | This work |
| BC-101-4-3740/3754 | BC-101-4 integrated a copy of <i>sbi_03740</i> and <i>sbi_03754</i> driven by the promoter region of gene <i>milR</i>                      | This work |
| BC-101-4-4700/3754 | BC-101-4 integrated a copy of <i>sbi_04700</i> and <i>sbi_03754</i> driven by the promoter region of gene <i>milR</i>                      | This work |
| BC04-3740/3754     | BC04 integrated a copy of <i>sbi_03740</i> and <i>sbi_03754</i> driven by the promoter region of gene <i>milR</i>                          | This work |
| BC04-4700/3754     | BC04 integrated a copy of <i>sbi_04700</i> and <i>sbi_03754</i> driven by the promoter region of gene <i>milR</i>                          | This work |
| BC-101-4-RPcs      | BC-101-4 integrated a copy of gene <i>sbi_01198</i> driven by the <i>milR</i> promoter                                                     | This work |
| BC-101-4-RPcc      | BC-101-4 integrated a copy of genes <i>sbi_04611</i> and <i>sbi_04601</i> driven by the <i>milR</i> promoter                               | This work |
| BC-101-4-RPsPc     | BC-101-4 integrated a copy of genes <i>sbi_01198</i> , <i>sbi_04611</i> and <i>sbi_04601</i> driven by the <i>milR</i> promoter            | This work |
| BC04-RPcs          | BC04 integrated a copy of gene <i>sbi_01198</i> driven by the <i>milR</i> promoter                                                         | This work |
| BC04-RPcc          | BC04 integrated a copy of genes <i>sbi_04611</i> and <i>sbi_04601</i> driven by the <i>milR</i> promoter                                   | This work |
| BC04-RPsPc         | BC04 integrated a copy of genes <i>sbi_01198</i> , <i>sbi_04611</i> and <i>sbi_04601</i> driven by the <i>milR</i> promoter                | This work |



|                        |                                                                                                                                                                                                                                                                                                                                                                                                                                                                                                           |           |
|------------------------|-----------------------------------------------------------------------------------------------------------------------------------------------------------------------------------------------------------------------------------------------------------------------------------------------------------------------------------------------------------------------------------------------------------------------------------------------------------------------------------------------------------|-----------|
| BC04-RPs- <i>n</i> Pc  | BC04 integrated a copy of gene <i>sbi_01198</i> driven by the <i>milR</i> promoter, <i>sbi_04611</i> and <i>sbi_04601</i> driven by native temporal promoter regions of genes, <i>n</i> (1-10) indicates the promoter of genes <i>sbi_00972</i> , <i>sbi_05175</i> , <i>sbi_05992</i> , <i>sbi_04950</i> , <i>sbi_09717</i> , <i>sbi_04323</i> , <i>sbi_04187</i> , <i>sbi_09292</i> , <i>sbi_03281</i> , <i>sbi_03269</i> , respectively                                                                 | This work |
| BC04-RAPs- <i>n</i> Pc | BC04 integrated a copy of genes <i>sbi_06761</i> , <i>sbi_03526</i> , <i>sbi_03527</i> and <i>sbi_01198</i> driven by the <i>milR</i> promoter, <i>sbi_04611</i> and <i>sbi_04601</i> driven by the native temporal promoter regions of genes, <i>n</i> (1-10) indicates the promoter of genes <i>sbi_00972</i> , <i>sbi_05175</i> , <i>sbi_05992</i> , <i>sbi_04950</i> , <i>sbi_09717</i> , <i>sbi_04323</i> , <i>sbi_04187</i> , <i>sbi_09292</i> , <i>sbi_03281</i> , <i>sbi_03269</i> , respectively | This work |
| <b>Plasmids</b>        |                                                                                                                                                                                                                                                                                                                                                                                                                                                                                                           |           |
| pSET152                | Am <sup>r</sup> , integrative <i>E. coli-Streptomyces</i> shuttle vector                                                                                                                                                                                                                                                                                                                                                                                                                                  | [1]       |
| pIJ10500               | Hyp <sup>r</sup> , containing ΦBT1 integrase gene and integration site attB                                                                                                                                                                                                                                                                                                                                                                                                                               | [1]       |
| pIJ10500::Porf1::ACC   | Hyp <sup>r</sup> , derived from pIJ10500, containing the genes <i>sbi_06761</i> , <i>sbi_03526</i> and <i>sbi_03527</i> driven by the promoter region of gene <i>orf1</i>                                                                                                                                                                                                                                                                                                                                 | This work |
| pIJ10500::PmilA1::ACC  | Hyp <sup>r</sup> , derived from pIJ10500, containing the genes <i>sbi_06761</i> , <i>sbi_03526</i> and <i>sbi_03527</i> driven by the promoter region of gene <i>milA1</i>                                                                                                                                                                                                                                                                                                                                | This work |
| pIJ10500::PmilA2::ACC  | Hyp <sup>r</sup> , derived from pIJ10500, containing the genes <i>sbi_06761</i> , <i>sbi_03526</i> and <i>sbi_03527</i> driven by the promoter region of gene <i>milA2</i>                                                                                                                                                                                                                                                                                                                                | This work |
| pIJ10500::PmilA4::ACC  | Hyp <sup>r</sup> , derived from pIJ10500, containing the genes <i>sbi_06761</i> , <i>sbi_03526</i> and <i>sbi_03527</i> driven by the promoter region of gene <i>milA4</i>                                                                                                                                                                                                                                                                                                                                | This work |
| pIJ10500::PmilR::ACC   | Hyp <sup>r</sup> , derived from pIJ10500, containing the genes <i>sbi_06761</i> , <i>sbi_03526</i> and <i>sbi_03527</i> driven by the promoter region of gene <i>milR</i>                                                                                                                                                                                                                                                                                                                                 | This work |
| pIJ10500::PmilF::ACC   | Hyp <sup>r</sup> , derived from pIJ10500, containing the genes <i>sbi_06761</i> , <i>sbi_03526</i> and <i>sbi_03527</i> driven by the promoter region of gene <i>milF</i>                                                                                                                                                                                                                                                                                                                                 | This work |

|                                      |                                                                                                                                                                                                                                                                                                                                                                                                                                                                                                                                                                                                                                                             |           |
|--------------------------------------|-------------------------------------------------------------------------------------------------------------------------------------------------------------------------------------------------------------------------------------------------------------------------------------------------------------------------------------------------------------------------------------------------------------------------------------------------------------------------------------------------------------------------------------------------------------------------------------------------------------------------------------------------------------|-----------|
| pSET152::PmilR::PCS                  | Am <sup>r</sup> , derived from pSET152, containing the gene <i>sbi_01198</i> driven by the <i>milR</i> promoter                                                                                                                                                                                                                                                                                                                                                                                                                                                                                                                                             | This work |
| pSET152::PmilR::PCC                  | Am <sup>r</sup> , derived from pSET152, containing the genes <i>sbi_04611</i> and <i>sbi_04601</i> driven by the <i>milR</i> promoter                                                                                                                                                                                                                                                                                                                                                                                                                                                                                                                       | This work |
| pSET152::PmilR::PCS::PCC             | Am <sup>r</sup> , derived from pSET152, containing the gene <i>sbi_01198</i> , <i>sbi_04611</i> and <i>sbi_04601</i> driven by the <i>milR</i> promoter                                                                                                                                                                                                                                                                                                                                                                                                                                                                                                     | This work |
| pSET152::PmilR::sbi_03740::sbi_03754 | Am <sup>r</sup> , derived from pSET152, containing the genes <i>sbi_03740</i> and <i>sbi_3754</i> driven by the <i>milR</i> promoter                                                                                                                                                                                                                                                                                                                                                                                                                                                                                                                        | This work |
| pSET152::PmilR::sbi_04700::sbi_03754 | Am <sup>r</sup> , derived from pSET152, containing the genes <i>sbi_04700</i> and <i>sbi_3754</i> driven by the <i>milR</i> promoter                                                                                                                                                                                                                                                                                                                                                                                                                                                                                                                        | This work |
| pSET152::PmilR::PCS::PnPCC           | Am <sup>r</sup> , derived from pSET152, a series of plasmids containing the gene <i>sbi_01198</i> driven by the <i>milR</i> promoter and gene <i>PCC</i> driven by the native temporal promoter regions of genes, <i>n</i> (1-10) indicates the genes <i>sbi_00972</i> ( <i>P1</i> ), <i>sbi_05175</i> ( <i>P2</i> ), <i>sbi_05992</i> ( <i>P3</i> ), <i>sbi_04950</i> ( <i>P4</i> ), <i>sbi_09717</i> ( <i>P5</i> ), <i>sbi_04323</i> ( <i>P6</i> ), <i>sbi_04187</i> ( <i>P7</i> ), <i>sbi_09292</i> ( <i>P8</i> ), <i>sbi_03281</i> ( <i>P9</i> ), <i>sbi_03269</i> ( <i>P10</i> ), respectively                                                         | This work |
| pSET152::PmilR::ACC::PCS::PnPCC      | Am <sup>r</sup> , derived from pSET152, a series of plasmids containing the gene <i>sbi_06761</i> , <i>sbi_03526</i> , <i>sbi_03527</i> and <i>sbi_01198</i> driven by the <i>milR</i> promoter, gene <i>PCC</i> driven by the native temporal promoter regions of genes, <i>n</i> (1-10) indicates the genes <i>sbi_00972</i> ( <i>P1</i> ), <i>sbi_05175</i> ( <i>P2</i> ), <i>sbi_05992</i> ( <i>P3</i> ), <i>sbi_04950</i> ( <i>P4</i> ), <i>sbi_09717</i> ( <i>P5</i> ), <i>sbi_04323</i> ( <i>P6</i> ), <i>sbi_04187</i> ( <i>P7</i> ), <i>sbi_09292</i> ( <i>P8</i> ), <i>sbi_03281</i> ( <i>P9</i> ), <i>sbi_03269</i> ( <i>P10</i> ), respectively | This work |

**Table S2. Primers used in this work**

| Primers      | Sequence (5'-3') <sup>a</sup>                                     | Usage                                                  |
|--------------|-------------------------------------------------------------------|--------------------------------------------------------|
| accA2-F      | ATGCAAAAGGTGCTCATCGCCAATC                                         | For amplification of <i>sbi_06761</i>                  |
| accA2-R      | TCAGTCTTTGATTTTCGCAGATGACG                                        |                                                        |
| accBE-F      | GCCGTCATCTGCGAAATCAAAGACTGAGGGAACGTACCGTCATTGCATGA                | For amplification of <i>sbi_03526-sbi_03527</i>        |
| accBE-R      | TCGTTAGTTAGGCTA <u>ACTAGTTC</u> AGCCCTGCCAGCTGTGC                 |                                                        |
| Porf1-F      | GTCCTCGAGAGGCCT <u>CATATG</u> GTCAGCACCCCTGCTACATCATCAA           | For amplification of promoter <i>P<sub>orf1</sub></i>  |
| Porf1-R      | GATTGGCGATGAGCACCTTTTGCATGGCCCTCCAGGACTGCTGTCA                    |                                                        |
| PmilA1-F     | GTCCTCGAGAGGCCT <u>CATATG</u> GTCAGCACCCCTGCTACATCATCAA           | For amplification of promoter <i>P<sub>milA1</sub></i> |
| PmilA1-R     | GATTGGCGATGAGCACCTTTTGCATGGCCCTCCAGGACTGCTGTCA                    |                                                        |
| PmilA2-F     | GTCCTCGAGAGGCCT <u>CATATG</u> GTCAGCACCCCTGCTACATCATCAA           | For amplification of promoter <i>P<sub>milA2</sub></i> |
| PmilA2-R     | GATTGGCGATGAGCACCTTTTGCATGGCCCTCCAGGACTGCTGTCA                    |                                                        |
| PmilA4-F     | GTCCTCGAGAGGCCT <u>CATATG</u> GTCAGCACCCCTGCTACATCATCAA           | For amplification of promoter <i>P<sub>milA4</sub></i> |
| PmilA4-R     | GATTGGCGATGAGCACCTTTTGCATGGCCCTCCAGGACTGCTGTCA                    |                                                        |
| PmilR-F      | GTCCTCGAGAGGCCT <u>CATATG</u> GTCAGCACCCCTGCTACATCATCAA           | For amplification of promoter <i>P<sub>milR</sub></i>  |
| PmilR-R      | GATTGGCGATGAGCACCTTTTGCATGGCCCTCCAGGACTGCTGTCA                    |                                                        |
| PmilF-F      | GTCCTCGAGAGGCCT <u>CATATG</u> GTCAGCACCCCTGCTACATCATCAA           | For amplification of promoter <i>P<sub>milF</sub></i>  |
| PmilF-R      | GATTGGCGATGAGCACCTTTTGCATGGCCCTCCAGGACTGCTGTCA                    |                                                        |
| SBI_01198-F  | ATGCCGGTGACCAGGCCGCT                                              | For amplification of <i>sbi_01198</i>                  |
| SBI_01198-R  | AACAGCTATGACATGATTAC <u>GAATTCT</u> CACGGGGTGTGACCGGCG            |                                                        |
| SBI_01198E-R | TTTCGGA <u>CTAGTTC</u> ACGGGGTGTGACCGGCG                          |                                                        |
| SBI_04611-F  | CACACCCCGTGAAGTACTGTCGAAA <u>AGTACTT</u> CAAGGAGGGAG<br>CCATCGTGC | For amplification of <i>sbi_04611</i>                  |
| SBI_04611-R  | TCAGTCCTTGATTTTCGCAGATGACG                                        |                                                        |
| SBI_04601-F  | CGTCATCTGCGAAATCAAGGACTGAGAGGACGAGCAGGAGCCGCATC                   |                                                        |

|              |                                                            |                                       |
|--------------|------------------------------------------------------------|---------------------------------------|
| SBI_04601-R  | AACAGCTATGACATGATTACGAATTCCTACAGCGGGATGTTGCCGTGCTTC        | For amplification of <i>sbi_04601</i> |
| PhrdB-F      | GGGCTGCAGGTCGACTCTAGACCGCCTTCCGCCGGAACG                    | For amplification of <i>hrdB</i>      |
| PhrdB-R      | AGCGGCCTGGTCACCGGCATGAACAACCTCTCGGAACGTTGAAAA              | promoter                              |
| PSBI_00972-F | CGCCGGTCACACCCCGTGAAGTACTCGCTCTGCCTGCCGCGCTGGTCTGC         | For amplification of                  |
| PSBI_00972-R | ACGATGGCTCCCTCCTTGAAGTACTGACACGCCCTCCTGCCACGCCATCC         | promoter P <sub>sbi_00972</sub>       |
| PSBI_05175-F | CGCCGGTCACACCCCGTGAAGTACTAGGTGCCGCCCTGCGGGT                | For amplification of                  |
| PSBI_05175-R | ACGATGGCTCCCTCCTTGAAGTACTGGACTTCTCTCCCCGATTTCCTC           | promoter P <sub>sbi_05175</sub>       |
| PSBI_05992-F | CGCCGGTCACACCCCGTGAAGTACTGCCAGGTGAGCATGCTCGC               | For amplification of                  |
| PSBI_05992-R | ACGATGGCTCCCTCCTTGAAGTACTTGGTCTGTCCCGTTCTTCTTGAGAA         | promoter P <sub>sbi_05992</sub>       |
| PSBI_04950-F | CGCCGGTCACACCCCGTGAAGTACTTACGCGACTTCGAGCGGTCC              | For amplification of                  |
| PSBI_04950-R | ACGATGGCTCCCTCCTTGAAGTACTGCCTCCCTGTTGTGCTTCGC              | promoter P <sub>sbi_04950</sub>       |
| PSBI_09717-F | CGCCGGTCACACCCCGTGAAGTACTACGAGGTTCCGGAGCCCAAGTCGG          | For amplification of                  |
| PSBI_09717-R | ACGATGGCTCCCTCCTTGAAGTACTCGCCGTATTCCCCTGCCCTCGG            | promoter P <sub>sbi_09717</sub>       |
| PSBI_04323-F | CGCCGGTCACACCCCGTGAAGTACTGCCAGGTGAGCATGCTCGC               | For amplification of                  |
| PSBI_04323-R | ACGATGGCTCCCTCCTTGAAGTACTGGAAGTCTCCCGTCACGAGGAGG           | promoter P <sub>sbi_04323</sub>       |
| PSBI_04187-F | CGCCGGTCACACCCCGTGAAGTACTGTACTACTTCTGCGAGGTCTTCTGG         | For amplification of                  |
| PSBI_04187-R | ACGATGGCTCCCTCCTTGAAGTACTGGGTGGACGAACCCCTC                 | promoter P <sub>sbi_04187</sub>       |
| PSBI_09292-F | CGCCGGTCACACCCCGTGAAGTACTCGACCGAGCCGCCGACTGAGC             | For amplification of                  |
| PSBI_09292-R | ACGATGGCTCCCTCCTTGAAGTACTGCGCGCCGCTCTCCCATGTCTT            | promoter P <sub>sbi_09292</sub>       |
| PSBI_03281-F | CGCCGGTCACACCCCGTGAAGTACTGGTCGTAGCGAACGGTGGCGATGAA         | For amplification of                  |
| PSBI_03281-R | ACGATGGCTCCCTCCTTGAAGTACTGGTGTTGCCCTTCAGGTGCGGGGT          | promoter P <sub>sbi_03281</sub>       |
| PSBI_03269-F | CGCCGGTCACACCCCGTGAAGTACTTGGACCAGCGGAAGGTCCCGGTCA          | For amplification of                  |
| PSBI_03269-R | ACGATGGCTCCCTCCTTGAAGTACTGTGCGCCCCCTCGTCGTGGGTCCGT         | promoter P <sub>sbi_03269</sub>       |
| SBI_03740-F  | CATGATCCGTGACAGCAGTCCTGGAGGGCCTTGTCCGGGGACCCCGTGCACCCGGTCT |                                       |

|              |                                                                                      |                                          |
|--------------|--------------------------------------------------------------------------------------|------------------------------------------|
| SBI_03740-R  | CTAAAAGCCCGCCGGCTCCGTATAGCTGCC                                                       | For amplification of<br><i>sbi_03740</i> |
| SBI_04700-F  | <b>CATGATCCGTGACAGCAGTCCTGGAGGGCC</b> ATGGCGCGCGATTTCGGAGTCGGGCTTCC                  | For amplification of<br><i>sbi_04700</i> |
| SBI_04700-R  | TCAGAAGGCATCGGCGGGGACATACGTACC                                                       |                                          |
| SBI_03754-F1 | <b>GGCAGCTATACGGAGCCGGCGGGCTTTTAG</b> ATGCTGACCAGAATCGACCACATCGGGA                   | For amplification of<br><i>sbi_03754</i> |
| SBI_03754-F2 | ATGCTGACCAGAATCGACCACATCGGGA                                                         |                                          |
| SBI_03754-R  | <b>GCCAGTGCCAAGCTTGGGCTGCAGGTCGAC</b> <u>GAATTCT</u> CAGCTCTTCGTACGGTCCTCGGA<br>GGTG |                                          |

<sup>a</sup> Bold type characters indicate homologous fragments, and the underline characters indicate restriction enzyme sit.

**Table S3. Temporal promoter and their strengths in BC-101-4 and BC04 used in this work**

| Promoter naming | Gene ID          | 18h      | 2d        | 3d        | 4d        | 6d        | 8d        |
|-----------------|------------------|----------|-----------|-----------|-----------|-----------|-----------|
| BC-101-4        |                  |          |           |           |           |           |           |
| P1              | <i>sbi_00972</i> | 4.090872 | 6.878499  | 7.913545  | 8.135700  | 7.392623  | 7.863440  |
| P2              | <i>sbi_05175</i> | 4.567386 | 6.987736  | 7.256083  | 7.499217  | 6.404183  | 6.531797  |
| P3              | <i>sbi_05992</i> | 5.773929 | 6.004744  | 6.764759  | 7.678828  | 7.747337  | 7.756427  |
| P4              | <i>sbi_04950</i> | 4.828707 | 6.643884  | 7.274602  | 8.300183  | 7.800410  | 8.155011  |
| P5              | <i>sbi_09717</i> | 6.101785 | 7.260918  | 7.648030  | 7.757221  | 7.487762  | 7.850243  |
| P6              | <i>sbi_04323</i> | 7.153607 | 8.084553  | 9.166491  | 9.710273  | 9.433166  | 9.679818  |
| P7              | <i>sbi_04187</i> | 8.045577 | 8.524642  | 9.538922  | 9.928432  | 9.983877  | 10.180663 |
| P8              | <i>sbi_09292</i> | 8.237638 | 9.919695  | 10.545469 | 10.845125 | 10.764878 | 11.238493 |
| P9              | <i>sbi_03281</i> | 9.116478 | 9.279103  | 10.046194 | 10.284767 | 10.390846 | 10.682231 |
| P10             | <i>sbi_03269</i> | 9.693670 | 12.088699 | 13.020067 | 13.560289 | 13.412348 | 13.176568 |
| BC04            |                  |          |           |           |           |           |           |
| P1              | <i>sbi_00972</i> | 3.396891 | 6.155781  | 7.840112  | 8.179029  | 8.171165  | 8.12389   |
| P2              | <i>sbi_05175</i> | 4.257788 | 6.847953  | 7.934483  | 8.424753  | 8.156127  | 8.370843  |
| P3              | <i>sbi_05992</i> | 4.989388 | 6.953562  | 6.89001   | 7.631178  | 8.381467  | 8.609141  |
| P4              | <i>sbi_04950</i> | 5.358833 | 7.874984  | 7.402656  | 8.342823  | 8.665964  | 9.106632  |
| P5              | <i>sbi_09717</i> | 5.945079 | 7.234325  | 7.853852  | 7.809499  | 8.057441  | 8.009625  |
| P6              | <i>sbi_04323</i> | 6.547695 | 8.220023  | 9.19416   | 9.177915  | 9.203987  | 9.266149  |
| P7              | <i>sbi_04187</i> | 7.431193 | 9.543858  | 9.471892  | 9.955108  | 9.850662  | 10.03478  |
| P8              | <i>sbi_09292</i> | 8.073007 | 10.61315  | 11.41202  | 11.33908  | 11.33302  | 11.53879  |
| P9              | <i>sbi_03281</i> | 8.483576 | 9.060209  | 10.24006  | 10.3648   | 10.64543  | 10.53407  |
| P10             | <i>sbi_03269</i> | 9.932167 | 12.87957  | 13.1092   | 13.6984   | 13.86001  | 13.99325  |

Data are given as log2-transformed of FPKM.

## References

1. Keiser, T.; Bipp, M.; Buttner, M.; Chater, K.F.; Hopwood, D.A. *Practical Streptomyces Genetics*. The John Innes Foundation, Norwich, UK, **2000**.
2. Wang, X.; Wang, X.; Xiang, W. Improvement of milbemycin-producing *Streptomyces bingchenggensis* by rational screening of ultraviolet- and chemically induced mutants. *World Journal of Microbiol. and Biotechnol.* **2009**, *25*, 1051-1056.
3. Zhang, Y.; He, H.; Liu, H.; Wang, H.; Wang, X.; Xiang, W. Characterization of a pathway-specific activator of milbemycin biosynthesis and improved milbemycin production by its overexpression in *Streptomyces bingchenggensis*. *Microb. Cell Fact.* **2016**, *15*, 152.
